# Supplementary material
Source: MDPI journal article supplement (https://www.mdpi.com/2073-4344/6/7/108)
Supplement: s1 [file s1]

# Supplementary Materials: An Oxygen Reduction Study of Graphene-Based Nanomaterials of Different Origin

Jaana Lilloja, Elo Kibena-Pöldsepp, Maito Merisalu, Protima Rauwel, Leonard Matisen, Ahti Niilisk, Eduardo S.F. Cardoso, Gilberto Maia, Väino Sammelselg and Kaido Tammeveski

## 1. Synthesis of Graphene Oxide (GO)

For the synthesis of GO by the modified Hummers' method [1] as reported elsewhere [2], 50 mL of concentrated sulphuric acid and 2 g of natural graphite powder (Graphite Trading Company) were mixed in a 250 mL beaker at room temperature. Then, the mixture was sonicated about 1 h. Thereafter, 2 g of sodium nitrate was added followed by the slow addition of 6 g of potassium permanganate. At the same time the mixture was stirred on a magnetic stirrer. Afterwards, the mixture was heated at 35 °C for 18 h. After 18 h, the beaker was put into an ice bath followed by addition of 80 mL Milli-Q water to the solution. Few minutes later, 20 mL of H<sub>2</sub>O<sub>2</sub> (30%) was added. The mixture was washed few times with 10% HCl solution and with Milli-Q water by centrifugation. Finally, the obtained brown solid was dried in vacuum at 75 °C.

## 2. Synthesis of Reduced Graphene Oxide (rGO)

rGO was synthesised similarly as reported by Lima et al. [3,4]. Briefly, 5 mL homogeneous aqueous dispersion of GO (5% *w/w*) was mixed with 5 mL of aqueous hydrazine sulphate solution (21 mg) and 39 µL of ammonium hydroxide solution (25 wt % in water) in a 20 mL glass vial. After being vigorously shaken for a few minutes, the vial was placed in a water bath (~95 °C) for 150 min. rGO was obtained after centrifugation to remove any aggregates remained in the suspension and then washed with 0.5% v/v ammonium hydroxide solution (100 mL). Excess ammonium hydroxide was removed by washing with Milli-Q water until a pH similar to Milli-Q was achieved. rGO was dried under vacuum at room temperature.

## 3. Scanning Electron Microscopy (SEM) Studies

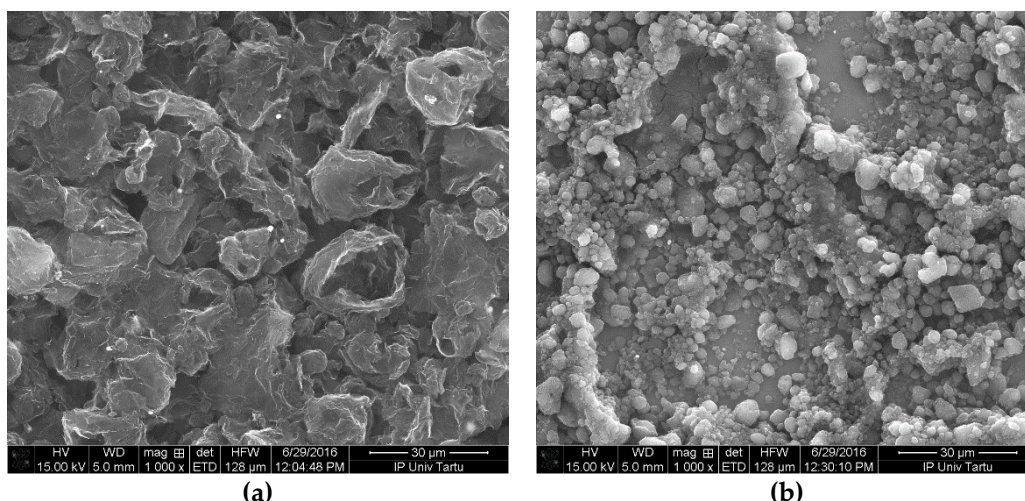

**Figure S1.** SEM images of: (a) graphene nanopowder (from Graphene Supermarket) and (b) graphene nanoplatelet aggregates (from Strem Chemicals).

#### 4. Oxygen Reduction Studies

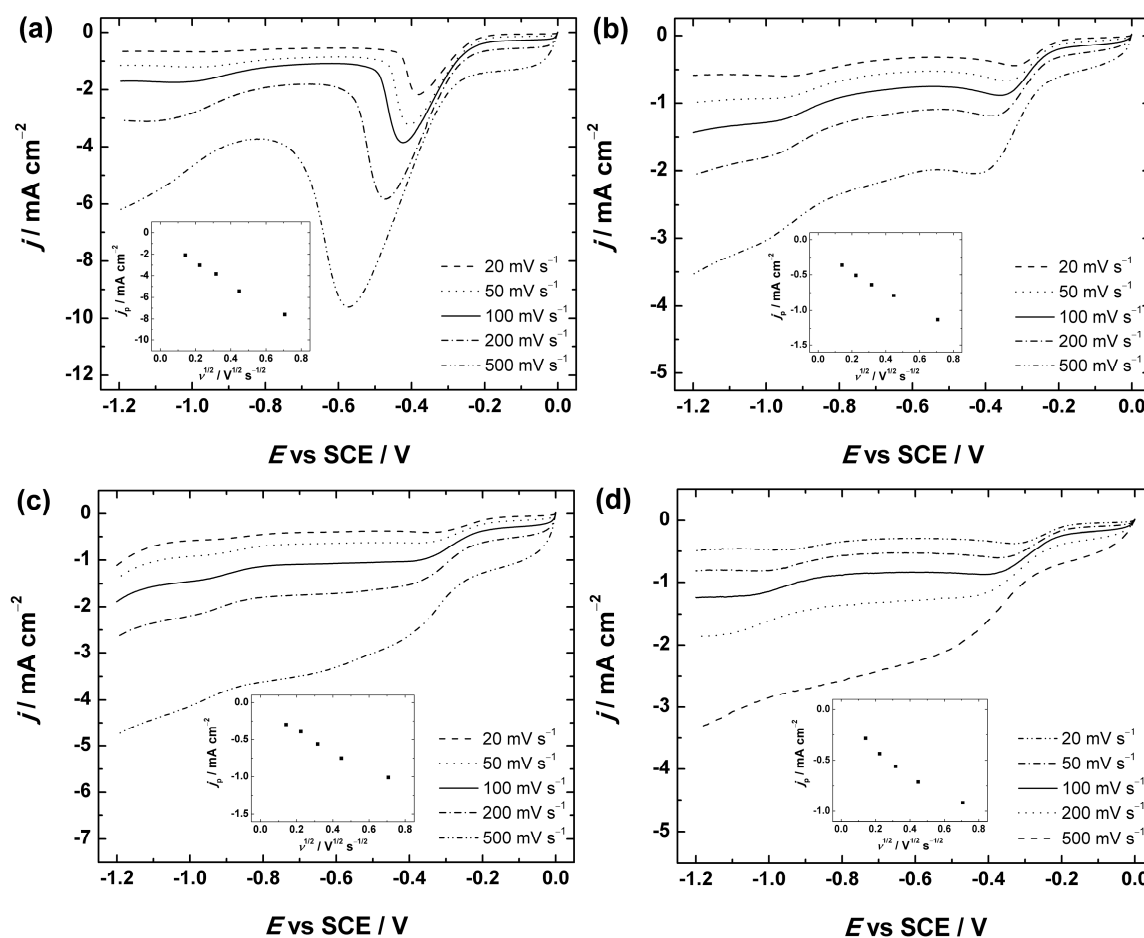

**Figure S2.** LSV results of O<sub>2</sub> reduction on GC electrodes coated with: (a) graphene nanopowder (from Graphene Supermarket); (b) graphene nanoplatelet aggregates (from Strem Chemicals); (c) graphene oxide and (d) reduced graphene oxide. The electrodes were prepared using the catalyst ink suspension in 2-propanol containing OH<sup>-</sup> ionomer. The LSVs were registered in O<sub>2</sub>-saturated 0.1 M KOH at different scan rates. The insets show the dependence of  $j_p$  on  $v^{1/2}$ .

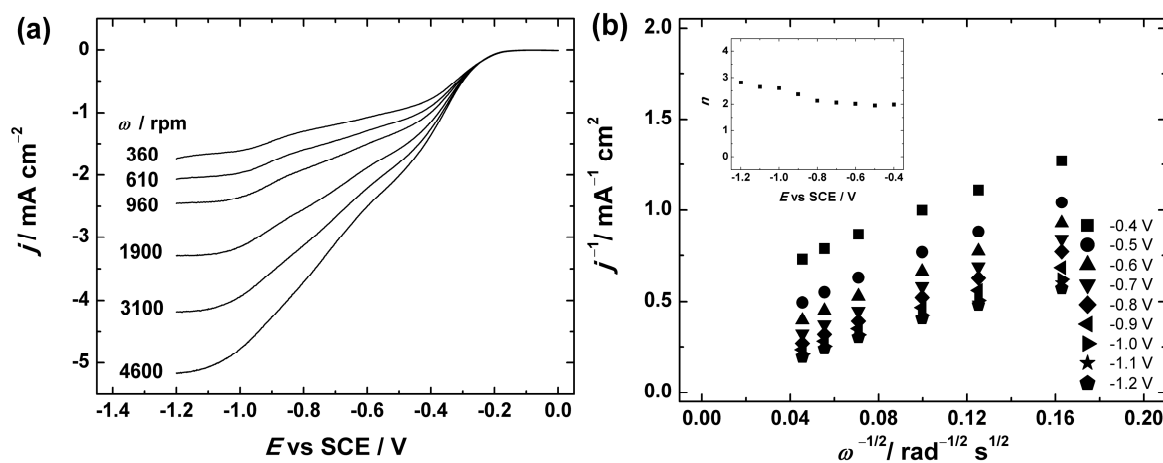

**Figure S3.** (a) RDE voltammetry curves and (b) Koutecky-Levich plots for oxygen reduction on GC electrodes coated with graphene oxide in O<sub>2</sub>-saturated 0.1 M KOH.  $\omega$  = 360–4600 rpm,  $v$  = 10 mV s<sup>-1</sup>. The inset shows the potential dependence of  $n$ . The electrode was prepared using the catalyst ink suspension in 2-propanol containing OH<sup>-</sup> ionomer.

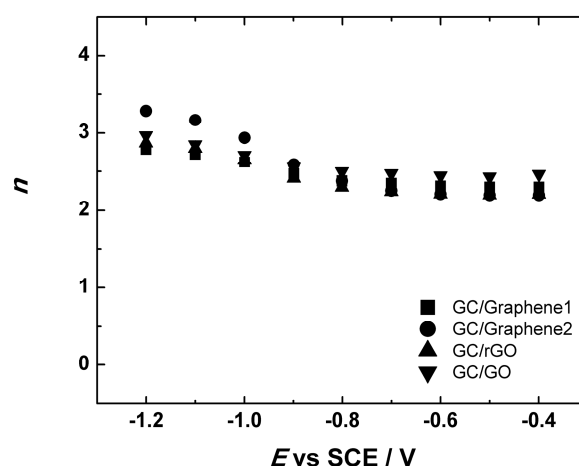

**Figure S4.** Potential dependence of  $n$  for GC electrodes modified with graphene nanopowder from Graphene Supermarket (GC/Graphene1), graphene nanoplatelet aggregates from Strem Chemicals (GC/Graphene2), reduced graphene oxide (GC/rGO) and graphene oxide (GC/GO) in  $O_2$ -saturated 0.1 M KOH. The electrodes were prepared using the catalyst ink suspension in 2-propanol containing  $OH^-$  ionomer. Data derived from Figure 7.

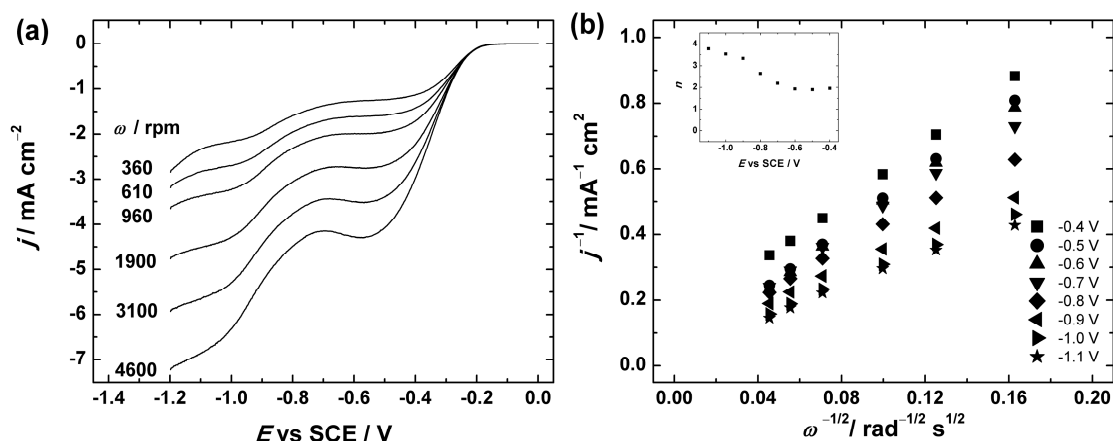

**Figure S5.** (a) RDE voltammetry curves and (b) Koutecky-Levich plots for oxygen reduction on GC electrodes coated with graphene oxide in  $O_2$ -saturated 0.1 M KOH.  $\omega = 360$ –4600 rpm,  $v = 10$  mV·s $^{-1}$ . The inset shows the potential dependence of  $n$ . The electrode was prepared using the catalyst ink suspension in DMF.

## References

1. Hummers, W.S.; Offeman, R.E. Preparation of graphitic oxide. *J. Am. Chem. Soc.* **1958**, *80*, 1339–1339.
2. Vikkisk, M.; Kruusenberg, I.; Joost, U.; Shulga, E.; Kink, I.; Tammeveski, K. Electrocatalytic oxygen reduction on nitrogen-doped graphene in alkaline media. *Appl. Catal. B-Environ.* **2014**, *147*, 369–376.
3. Lima, F.; Fortunato, G.V.; Maia, G. A remarkably simple characterization of glassy carbon-supported films of graphite, graphene oxide, and chemically converted graphene using  $Fe(CN)_6^{3-}/Fe(CN)_6^{4-}$  and  $O_2$  as redox probes. *RSC Adv.* **2013**, *3*, 9550–9560.
4. Lima, F.; Maia, G. Oxidized/reduced graphene nanoribbons facilitate charge transfer to the  $Fe(CN)_6^{3-}/Fe(CN)_6^{4-}$  redox couple and towards oxygen reduction. *Nanoscale* **2015**, *7*, 6193–6207.
